# Supplementary material
Source: PubMed Central journal article supplement (PMC2904864)
Supplement: NIHMS201202-supplement-1.pdf [file NIHMS201202-supplement-1.pdf]

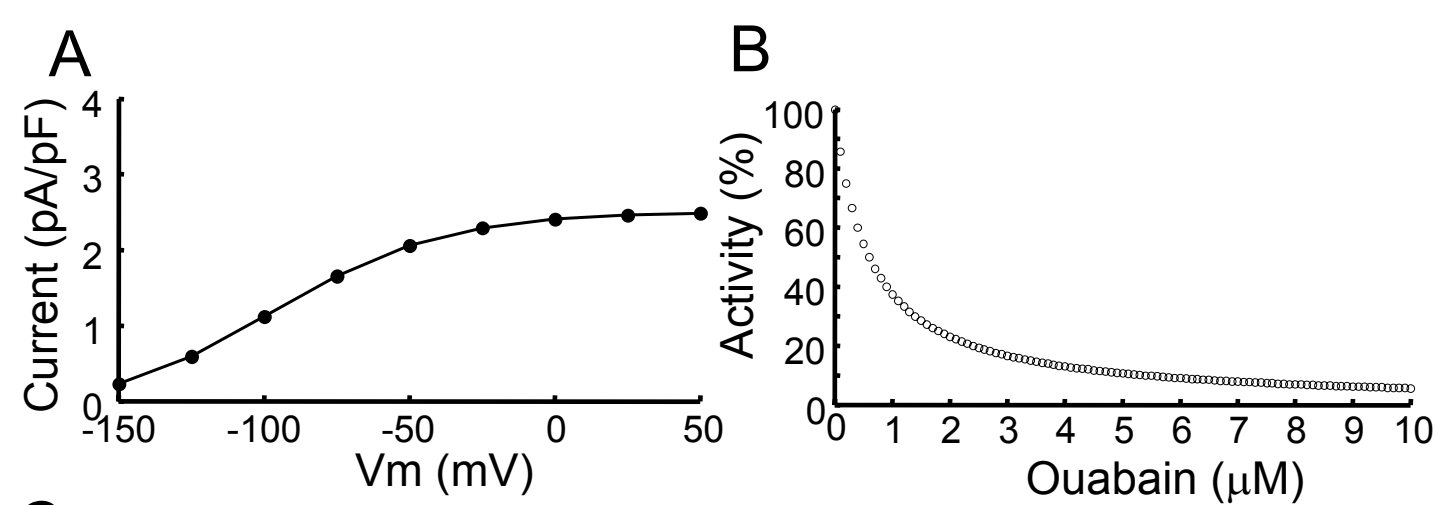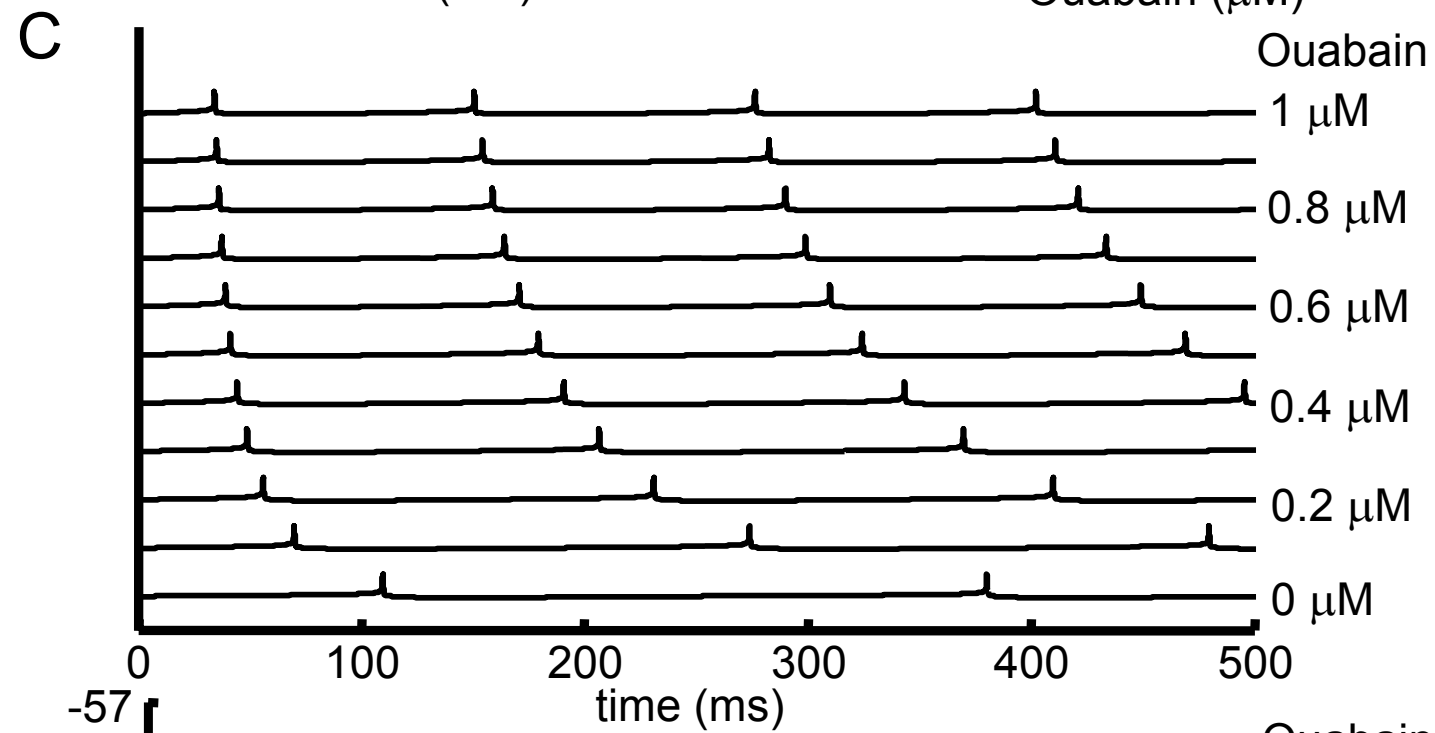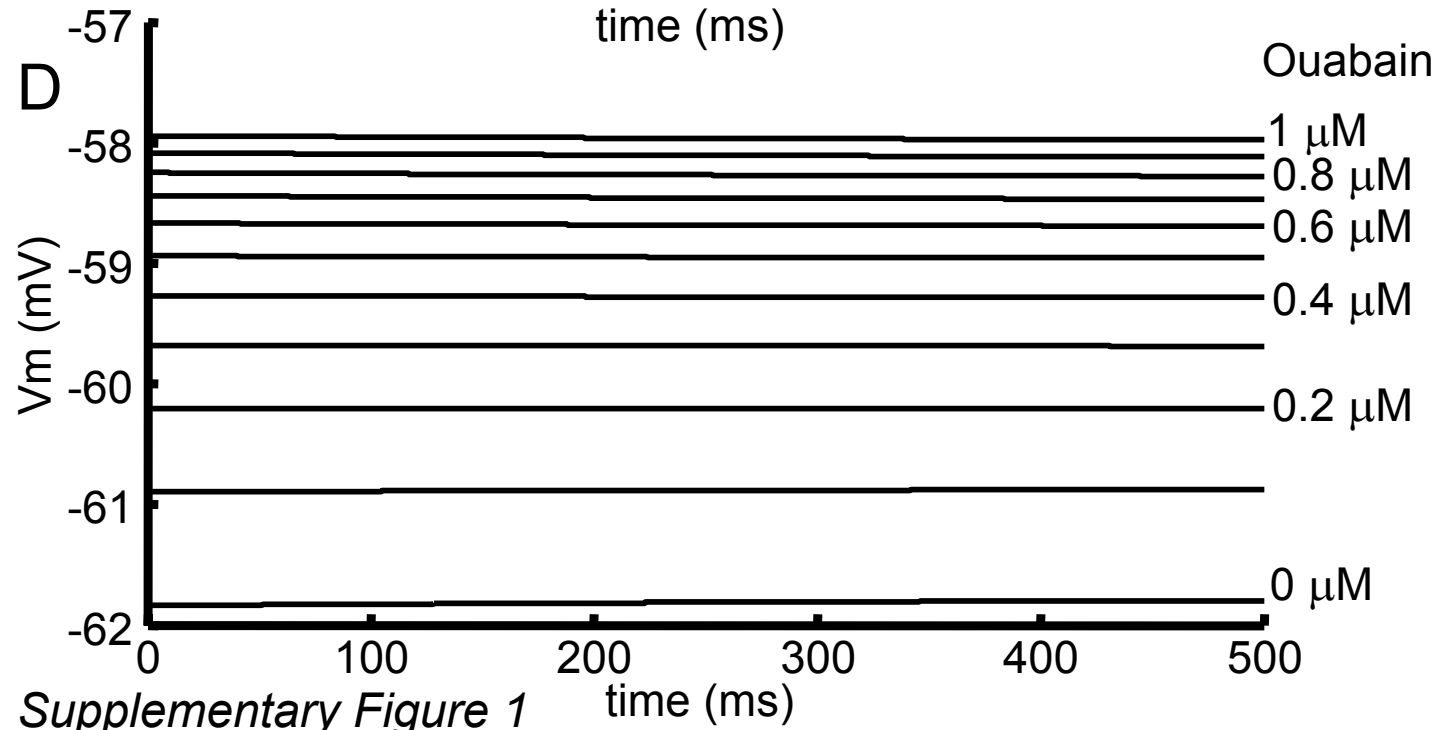

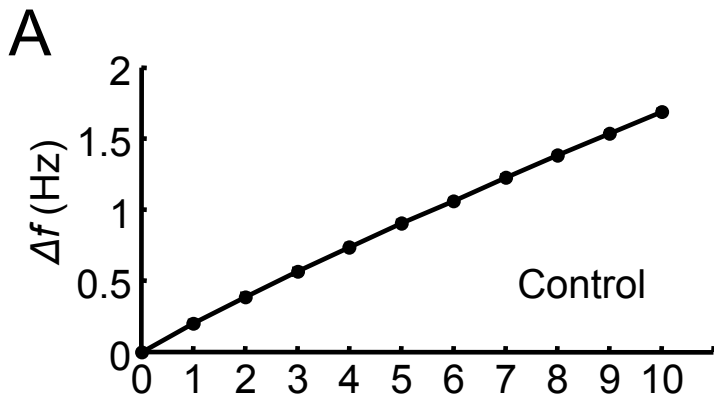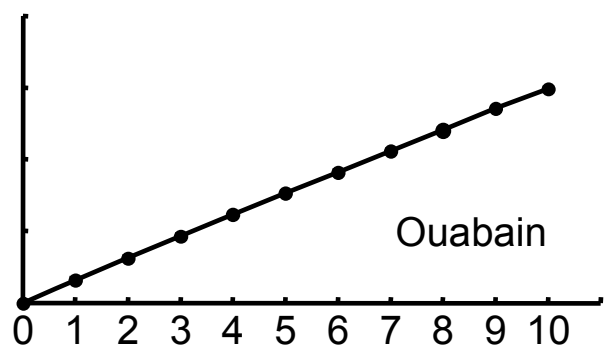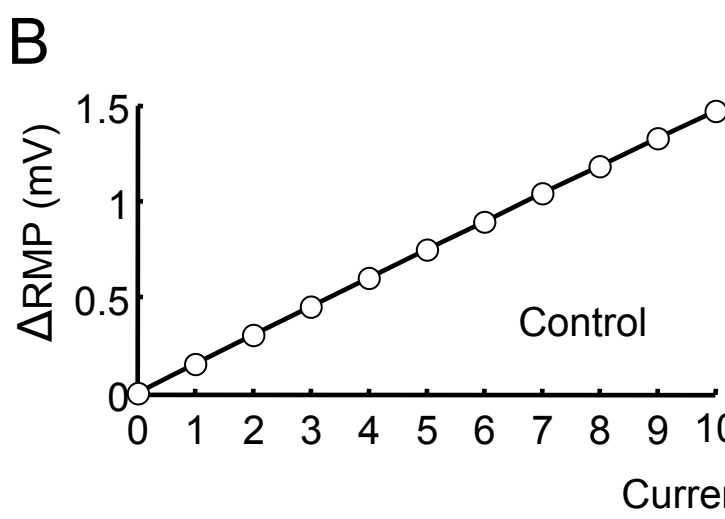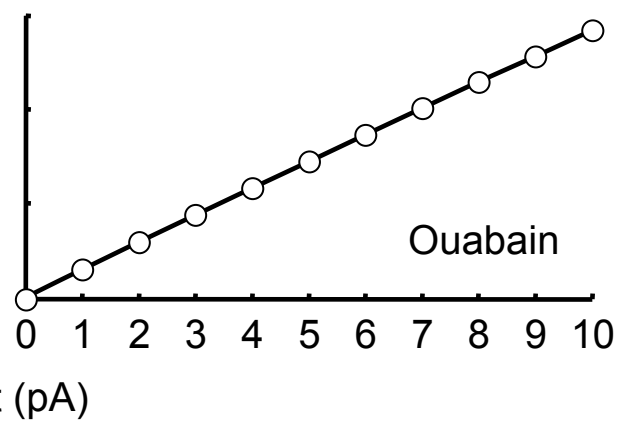

Supplementary Figure 2

**Supplementary Fig 1. Computer modeling of the Na<sup>+</sup>/K<sup>+</sup> ATPase in GoCs.** **A**, The isolated Na<sup>+</sup>/K<sup>+</sup> ATPase current increases with membrane potential, in agreement with the findings of Takeuchi et al., (2006). Ionic concentrations used in simulation are given in the text. **B**, Simulation of the effect of increased concentrations of ouabain on Na<sup>+</sup>/K<sup>+</sup> ATPase function. **C and D**, Simulation of the effect of increasing concentrations of ouabain (0, 0.1, 0.2, 0.3, 0.4, 0.5, 0.6, 0.7, 0.8, 0.9, and 1 μM) on spontaneous action potential firing and membrane potential.

**Supplementary Fig 2. Computer modeling of the effect of ouabain on the firing frequency and RMP response to current injection.** **A**, Average GoC current-frequency plots simulated under control conditions and in presence of 0.1 μM ouabain. Firing frequency was calculated as the inverse of the mean interspike interval. **B**, GoC current-RMP plots simulated under control conditions and in presence of 0.1 μM ouabain. There is a slight increase in the maximum change in the resting membrane potential ( $\Delta RMP$ ) and  $\Delta f$  (Hz) in the model with ouabain due the small 3 M $\Omega$  decrease of  $R_{in}$ .
